# Supplementary material for: Confocal μ-XANES as a tool to analyze Fe oxidation state in heterogeneous samples: the case of melt inclusions in olivine from the Hekla volcano
Source: Copernicus journal article supplement (doi:10.5194/ejm-36-195-2024), 2024-02-12
Supplement: Supplementary file 1 [file ejm-36-195-2024-supplement.zip]

Archive with 2 entries (2 files):
- ejm-36-195-2024-supplement-title-page.pdf
- Table S1_Reference-materials.xlsx
