# Supplementary material for: Confocal μ-XANES as a tool to analyze Fe oxidation state in heterogeneous samples: the case of melt inclusions in olivine from the Hekla volcano
Source: Copernicus journal article supplement (doi:10.5194/ejm-36-195-2024), 2024-02-12
Supplement: Supplementary file 1 [file ejm-36-195-2024-supplement.zip › ejm-36-195-2024-supplement-title-page.pdf]

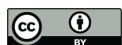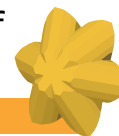

*Supplement of*

**Confocal  $\mu$ -XANES as a tool to analyze Fe oxidation state in heterogeneous samples: the case of melt inclusions in olivine from the Hekla volcano**

**Roman Botcharnikov et al.**

*Correspondence to:* Roman Botcharnikov (rbotchar@uni-mainz.de)

- ejm-36-195-2024-supplement-title-page.pdf
- Table S1\_Reference-materials.xlsx

The copyright of individual parts of the supplement might differ from the article licence.
