# Supplementary material for: Confocal μ-XANES as a tool to analyze Fe oxidation state in heterogeneous samples: the case of melt inclusions in olivine from the Hekla volcano
Source: Copernicus journal article supplement (doi:10.5194/ejm-36-195-2024), 2024-02-12
Supplement: Supplementary file 1 [file ejm-36-195-2024-supplement.zip › Table S1_Reference-materials.xlsx]

## Sheet: Supplem Table References
Botcharnikov et al.; Confocal m-XANES as a tool to analyse Fe oxidation state in heterogeneous samples: The case of melt inclusions in olivine from Hekla volcano
Table S1. Reference materials
Sample #	Description	FeO, wt%	Fe3+/SFe, %	Fe3+/SFe, %	Centroid, eV	Centroid, eV	Fe3+/SFe, %	Reference		Comments
			Mössbauer	Wet chemistry	Normal XANES	Confocal XANES	Confocal XANES
B11	ferrobasalt, synthetic glass	12.49	19		7112.42	7112.5	20.8	Bo2005
B14	ferrobasalt, synthetic glass	11.33	8		7112.31	7112.25	10	Bo2005
B17	ferrobasalt, synthetic glass	12.65	60		7113.23	7113.18	57.5667	Bo2005
B20	ferrobasalt, synthetic glass	12.8	25		7112.59	7112.61	25.7333	Bo2005
B22	ferrobasalt, synthetic glass	12.77	28		7112.67	7112.64	26	Bo2005
B21	ferrobasalt, synthetic glass	12.34	49		7113.19	7113.1	51.8	Bo2005
B6	ferrobasalt, synthetic glass	12.94	39			7112.91	39.7	Bo2005
A39 (SC1-oxi)	ferrobasalt, synthetic glass	12.9		66		7113.31	68.9	Zh18		Wet chemistry method after Sc2008
tonalite, air 1600	haplotonalite, synthetic glass	1.43976	36		7112.98			Wi2002; Wi2006		Glass composition and Mössbauer spectrum after Wi2002; XANES after Wi2006
tonalite, air 1600	haplotonalite, synthetic glass	1.43976	36		7112.95			Wi2002; Wi2006		Same sample; unpublished XANES measurement using setup of Wi2006
aoq air, 1600	haplogranite, AOQ, synthetic glass	3.82435		65	7113.22			Wi2007		Glass composition after Wi2007; Fe3+/SFe ratio is from this study using the method of Sc2008; unpublished XANES using setup of Wi2004
IBR_02_70	rhyolite, synthetic glass	3.98		21		7112.72	22.1	Al2012		Glass composition is after Al2012; the Fe3+/SFe ratio is from this study using the method of Sc2008
IBR_02_air	rhyolite, synthetic glass	3.98		71		7113.35	70.9	Al2012		Glass composition is after Al2012; the Fe3+/SFe ratio is from this study using the method of Sc2008
Melt inclusions in olivine
#MI1	basalt, MORB	7.68						unpublished		Sample from East Pasific Rise, Sequeros Fracture Zone
#MI44	basalt, arc magma	6.18						unpublished		Sample from Chile|Los Hornitos / Cerro Azul
Al2012	Almeev, R.R., Bolte, T., Nash, B.P., Holtz, F., Erdmann, M., Cathey, H.E.: High-temperature, low-H2O Silicic Magmas of the Yellowstone Hotspot: an Experimental Study of Rhyolite from the Bruneau–Jarbidge Eruptive Center, Central Snake River Plain, USA, Journal of Petrology, 53: 1837–1866, https://doi.org/10.1093/petrology/egs035, 2012.
Bo2005	Botcharnikov, R.E., Koepke, J., Holtz, F., McCammon, C., and Wilke, M.: The effect of water activity on the oxidation and structural state of Fe in a ferrobasaltic melt. Geochim. Cosmochim. Acta, 69 (21), 5071-5085, 2005.
Sc2008	Schuessler, J., Botcharnikov, R., Behrens, H., Misiti, V. and Freda, C.: Amorphous Materials: Properties, structure, and durability: Oxidation state of iron in hydrous phono-tephritic melts. American Mineralogist, 93(10) 1493-1504. https://doi.org/10.2138/am.2008.2795, 2008.
Wi2002	Wilke, M., Behrens, H., Burkhard, D.J.M., Rossano, S.: The oxidation state of iron in silicic melt at 500 MPa water pressure. Chemical Geology, 189(1): 55-67, 2002.
Wi2004	Wilke M., Partzsch G. M., Bernhardt R., and Lattard D.: Determination of the iron oxidation state in basaltic glasses using XANES at the K-edge. Chem. Geol. 213, 71–87, 2004.
Wi2006	Wilke, M., Schmidt, C., Farges, F., Malavergne, V., Gautron, L., Simionovici, A., Hahn, M., and Petit, P.E.: Structural environment of Fe in water-bearing silicate glass and melt e evidence from X-ray absorption spectroscopy. Chem. Geol. 229, 144-161, 2006.
Wi2007	Wilke, M., Farges, F., Partzsch, G.M., Schmidt, C., and Behrens, H.: Speciation of iron in silicate glasses and melts by in-situ XANES spectroscopy. Am. Mineral. 92, 44-56, 2007.
Zh2018	Zhang, C., Almeev, R.R., Hughes, E., Borisov, A.A., Wolff, E.P., Höfer, H.E., Botcharnikov, R.E., and Koepke, J.: Electron microprobe technique for the determination of iron oxidation state in silicate glasses. Am. Mineralogist 103 : 1445-1454, 2018.
